# Supplementary material for: An Innovative Machine Learning Approach to Predict the Dietary Fiber Content of Packaged Foods
Source: Nutrients. 2021 Sep 14;13(9):3195. doi: 10.3390/nu13093195 (PMC8470168; doi:10.3390/nu13093195)
Supplement: Supplementary file 1 [file nutrients-13-03195-s001.zip › nutrients-1355889-supplementary.pdf]

**Supplementary Table S1:** Included and excluded food categories

| Food group                    | Food category                              | <i>n</i> | Proportion of products that report fiber content (%) | Proportion of dietary fiber intake (%) |
|-------------------------------|--------------------------------------------|----------|------------------------------------------------------|----------------------------------------|
| Bread and bakery products     | Biscuits                                   | 2,246    | 39                                                   | 1.8                                    |
|                               | Bread                                      | 2,007    | 63                                                   | 14.5                                   |
|                               | Cakes, muffins, and pastries               | 1,581    | 29                                                   | 4.2                                    |
| Cereal and grain products     | Breakfast cereals                          | 1,427    | 87                                                   | 10.6                                   |
|                               | Cereal and nut-based bars                  | 724      | 89                                                   | 0.8                                    |
|                               | Couscous                                   | 71       | 64                                                   | 0.0                                    |
|                               | Noodles                                    | 285      | 30                                                   | 0.2                                    |
|                               | Pasta                                      | 1,014    | 55                                                   | 1.7                                    |
|                               | Rice                                       | 391      | 62                                                   | 0.2                                    |
|                               | Other cereal and grain products            | 834      | 63                                                   | 2.2                                    |
| Confectionery                 | Chocolate and sweets                       | 3,780    | 12                                                   | 0.6                                    |
|                               | Jelly                                      | 172      | 34                                                   | 0.0                                    |
|                               | Chewing gum                                | 114      | 93                                                   | 0.0                                    |
|                               | Cough lollies                              | 30       | 40                                                   | 0.0                                    |
| Convenience foods             | Pizza                                      | 175      | 25                                                   | 0.1                                    |
|                               | Pre-prepared salads and sandwiches         | 542      | 30                                                   | 0.2                                    |
|                               | Ready meals                                | 1,430    | 40                                                   | 9.0                                    |
|                               | Soup                                       | 973      | 51                                                   | 2.7                                    |
|                               | Meal kits                                  | 48       | 18                                                   | 0.2                                    |
|                               | Other frozen foods not otherwise specified | 24       | 41                                                   | 0.2                                    |
| Dairy                         | Cheese                                     | 2,048    | 6                                                    | 0.0                                    |
|                               | Cream                                      | 178      | 8                                                    | 0.0                                    |
|                               | Desserts                                   | 481      | 16                                                   | 0.2                                    |
|                               | Ice cream and edible ices                  | 1,259    | 20                                                   | 0.0                                    |
|                               | Milk                                       | 1,516    | 23                                                   | 0.5                                    |
|                               | Yoghurt and yoghurt drinks                 | 1,594    | 16                                                   | 0.2                                    |
| Edible oils and oil emulsions | Cooking oils                               | 67       | 11                                                   | 0.0                                    |
|                               | Edible oils                                | 358      | 8                                                    | 0.0                                    |
|                               | Cooking oil spray                          | 38       | 7                                                    | 0.0                                    |
|                               | Coconut oil                                | 67       | 11                                                   | 0.0                                    |
| Fish and fish products        | Processed fish                             | 1,704    | 11                                                   | 0.6                                    |
| Fruit and vegetables          | Fruit                                      | 1,796    | 62                                                   | 15.0                                   |
|                               | Herbs and spices                           | 668      | 8                                                    | 0.1                                    |
|                               | Jam and marmalades                         | 439      | 15                                                   | 0.2                                    |
|                               | Nuts and seeds                             | 1,262    | 47                                                   | 3.8                                    |
|                               | Vegetables                                 | 2,280    | 49                                                   | 18.8                                   |
| Meat and meat products        | Meat alternatives                          | 332      | 69                                                   | 0.1                                    |
|                               | Processed meat                             | 3,320    | 11                                                   | 5.1                                    |

| Food group                           | Food category                         | <i>n</i> | Proportion of products that report fiber content (%) | Proportion of dietary fiber intake (%) |
|--------------------------------------|---------------------------------------|----------|------------------------------------------------------|----------------------------------------|
| Non-alcoholic beverages              | Coffee and tea                        | 791      | 14                                                   | 1.2                                    |
|                                      | Cordials                              | 221      | 41                                                   | 0.1                                    |
|                                      | Electrolyte drinks                    | 78       | 75                                                   | 0.1                                    |
|                                      | Energy drinks                         | 131      | 30                                                   | 0.1                                    |
|                                      | Fruit and vegetable juices            | 1,647    | 49                                                   | 1.9                                    |
|                                      | Soft drinks                           | 1155     | 32                                                   | 0.1                                    |
|                                      | Waters                                | 502      | 38                                                   | 0.1                                    |
|                                      | Beverage mixes                        | 142      | 45                                                   | 0.1                                    |
| Sauces, dressings, spreads, and dips | Mayonnaise and salad dressings        | 693      | 7                                                    | 0.1                                    |
|                                      | Sauces                                | 3,263    | 17                                                   | 0.6                                    |
|                                      | Spreads and dips                      | 1,450    | 18                                                   | 0.4                                    |
| Snackfoods                           | Crisps and snacks                     | 1,825    | 53                                                   | 1.2                                    |
| Sugars, honey, and related products  | Honey                                 | 301      | 2                                                    | 0.0                                    |
|                                      | Dessert toppings                      | 136      | 11                                                   | 0.0                                    |
|                                      | Syrup                                 | 149      | 13                                                   | 0.0                                    |
|                                      | Dessert additions                     | 203      | 23                                                   | 0.0                                    |
|                                      | Condensed caramel                     | 9        | 0                                                    | 0.0                                    |
|                                      | Sugar                                 | 125      | 15                                                   | 0.0                                    |
|                                      | Sweeteners                            | 67       | 28                                                   | 0.0                                    |
| Special foods                        | Diet drink mixes (meal replacements)  | 159      | 81                                                   | 0.0                                    |
|                                      | Diet soup mixes (meal replacements)   | 6        | 83                                                   | 0.0                                    |
|                                      | Breakfast beverages                   | 125      | 92                                                   | 0.1                                    |
|                                      | Baby foods                            | 424      | 37                                                   | 0.0                                    |
|                                      | Sports/protein powders                | 607      | 56                                                   | 0.0                                    |
|                                      | Sports gels                           | 26       | 30                                                   | 0.0                                    |
|                                      | Protein and diet bars                 | 392      | 90                                                   | 0.1                                    |
|                                      | Other fitness or diet products        | 191      | 74                                                   | 0.0                                    |
|                                      | Variety packs not otherwise specified | 1        | 0                                                    | 0.0                                    |
|                                      | Milk-based protein drinks             | 79       | 55                                                   | 0.0                                    |

Included categories are highlighted.

Fiber intake proportions were adapted from the Australian Bureau of Statistics (ABS) website [1]. The ABS categorization system was mapped to the categorization system used in this analysis to obtain these fiber intake values. We used fiber intake information that related to the entire food supply as there is no information specifically for packaged products.

**Supplementary Table S2:** Descriptive statistics on nutrients for included products

| <b>Nutrient<br/>(per 100g/mL)</b> | <b><i>n</i></b> | <b>Mean</b> | <b>SD</b> | <b>Min</b> | <b>25<sup>th</sup><br/>quartile</b> | <b>Median</b> | <b>75<sup>th</sup><br/>quartile</b> | <b>Max</b> | <b>Spearman<br/>correlation<br/>with fiber</b> |
|-----------------------------------|-----------------|-------------|-----------|------------|-------------------------------------|---------------|-------------------------------------|------------|------------------------------------------------|
| Sugar (g)                         | 21,246          | 12.0        | 15.4      | 0.0        | 1.9                                 | 4.8           | 16.7                                | 94.0       | 0.09                                           |
| Starch (g)                        | 21,246          | 26.8        | 23.4      | 0.0        | 4.6                                 | 21.5          | 44.9                                | 90.0       | 0.29                                           |
| Saturated fat (g)                 | 21,246          | 3.4         | 5.3       | 0.0        | 0.3                                 | 1.2           | 4.3                                 | 66.8       | 0.32                                           |
| Unsaturated fat (g)               | 21,246          | 8.4         | 12.0      | 0.0        | 0.8                                 | 3.3           | 10.8                                | 67.4       | 0.47                                           |
| Protein (g)                       | 21,246          | 7.4         | 6.2       | 0.0        | 2.6                                 | 6.4           | 10.1                                | 81.1       | 0.64                                           |
| Sodium (mg)                       | 21,246          | 301         | 517       | 0          | 16                                  | 225           | 400                                 | 1800       | -0.02                                          |
| Fiber (g)                         | 11,441          | 5.2         | 5.9       | 0.0        | 1.7                                 | 3.6           | 7.2                                 | 90.1       | 1.00                                           |

SD is standard deviation

**Supplementary Table S3:** Training dataset scores using five-fold cross validation and various combinations of hyperparameters

| Hyperparameters  |                 |                     | Mean Score using Five-Fold Cross-validation (SD) |                             |                    |                    |
|------------------|-----------------|---------------------|--------------------------------------------------|-----------------------------|--------------------|--------------------|
| Distance metric  | Weight function | Number of neighbors | R <sup>2</sup>                                   | MAE (g per 100 g or 100 mL) | $\rho$             | CA                 |
| Euclidean        | Uniform         | 1                   | 0.67 (0.06)                                      | 1.80 (0.20)                 | 0.79 (0.02)        | 0.66 (0.02)        |
| Euclidean        | Uniform         | 3                   | 0.74 (0.06)                                      | 1.66 (0.21)                 | 0.83 (0.02)        | 0.67 (0.02)        |
| Euclidean        | Uniform         | 5                   | 0.74 (0.06)                                      | 1.66 (0.24)                 | 0.83 (0.02)        | 0.67 (0.02)        |
| Euclidean        | Uniform         | 8                   | 0.74 (0.06)                                      | 1.68 (0.25)                 | 0.83 (0.02)        | 0.67 (0.02)        |
| Euclidean        | Uniform         | 10                  | 0.73 (0.06)                                      | 1.69 (0.25)                 | 0.83 (0.02)        | 0.67 (0.02)        |
| Euclidean        | Distance        | 1                   | 0.67 (0.06)                                      | 1.80 (0.20)                 | 0.79 (0.02)        | 0.65 (0.02)        |
| Euclidean        | Distance        | 3                   | 0.74 (0.06)                                      | 1.61 (0.20)                 | 0.83 (0.02)        | 0.68 (0.02)        |
| Euclidean        | Distance        | 5                   | 0.75 (0.06)                                      | 1.58 (0.20)                 | 0.84 (0.02)        | 0.69 (0.02)        |
| Euclidean        | Distance        | 8                   | 0.76 (0.06)*                                     | 1.58 (0.22)                 | 0.84 (0.02)        | 0.68 (0.02)        |
| Euclidean        | Distance        | 10                  | 0.76 (0.06)*                                     | 1.58 (0.22)                 | 0.84 (0.02)        | 0.68 (0.02)        |
| Manhattan        | Uniform         | 1                   | 0.67 (0.06)                                      | 1.78 (0.20)                 | 0.79 (0.02)        | 0.66 (0.02)        |
| Manhattan        | Uniform         | 3                   | 0.73 (0.06)                                      | 1.66 (0.21)                 | 0.83 (0.02)        | 0.68 (0.02)        |
| Manhattan        | Uniform         | 5                   | 0.74 (0.06)                                      | 1.66 (0.24)                 | 0.83 (0.02)        | 0.67 (0.02)        |
| Manhattan        | Uniform         | 8                   | 0.74 (0.06)                                      | 1.67 (0.26)                 | 0.83 (0.02)        | 0.68 (0.02)        |
| Manhattan        | Uniform         | 10                  | 0.73 (0.06)                                      | 1.71 (0.26)                 | 0.83 (0.02)        | 0.67 (0.02)        |
| Manhattan        | Distance        | 1                   | 0.67 (0.06)                                      | 1.78 (0.20)                 | 0.79 (0.02)        | 0.66 (0.02)        |
| Manhattan        | Distance        | 3                   | 0.74 (0.06)                                      | 1.61 (0.19)                 | 0.83 (0.02)        | 0.68 (0.02)        |
| Manhattan        | Distance        | 5                   | 0.75 (0.06)                                      | 1.58 (0.21)                 | 0.84 (0.02)        | 0.69 (0.02)        |
| <b>Manhattan</b> | <b>Distance</b> | <b>8</b>            | <b>0.76 (0.06)*</b>                              | <b>1.57 (0.22)</b>          | <b>0.84 (0.02)</b> | <b>0.69 (0.02)</b> |
| Manhattan        | Distance        | 10                  | 0.75 (0.06)                                      | 1.59 (0.23)                 | 0.84 (0.02)        | 0.69 (0.02)        |

SD is standard deviation

The Euclidean distance is calculated using  $d(x, y) = \sqrt{\sum_{i=1}^6 (x_i - y_i)^2}$  and the Manhattan distance is calculated using  $d(x, y) = \sum_{i=1}^6 |x_i - y_i|$ , where  $x_i$  and  $y_i$  refer to the  $i$ -th normalized nutrient value of the query point and training point respectively.

The uniform weight function weights neighbors uniformly and the distance weight function weights neighbors by the inverse of their distance.

R<sup>2</sup> is the coefficient of determination. It represents the proportion of variance in fiber content explained by the features in the model, where 1 indicates a perfect fit.

MAE is mean absolute error. It is the average of all absolute errors.

$\rho$  is the Spearman rank correlation. It represents how well the model ranks products from highest to lowest in fiber content, where 1 indicates perfect ranking.

CA is classification accuracy. It measures the proportion of correctly predicted fiber classes. Classes are defined (in g per 100g or 100mL) as: negligible density [0,0.9), low density [0.9, 3.7), medium density [3.7, 7.3), and high density [7.3, 100].

\*Three combinations produced an R<sup>2</sup> score of 0.76. To break the tie, MAE was considered

Supplementary Text S1: Example application of the KNN fiber prediction algorithm

| Product    | Subcategory <sup>1</sup> | Nutrients (per 100g/mL) |            |             |                   |                     |             | d       | Fiber (g/100g) |
|------------|--------------------------|-------------------------|------------|-------------|-------------------|---------------------|-------------|---------|----------------|
|            |                          | Sugar (g)               | Starch (g) | Protein (g) | Saturated fat (g) | Unsaturated fat (g) | Sodium (mg) |         |                |
| Query      | Bars                     | 23.2                    | 41.4       | 6.8         | 1.3               | 4.4                 | 15          |         |                |
| Neighbor 1 | Bars                     | 21.6                    | 40.4       | 7.5         | 0.9               | 3.9                 | 130         | 0.05212 | 11.5           |
| Neighbor 2 | Bars                     | 18.3                    | 42.1       | 7.5         | 1.6               | 4.8                 | 180         | 0.08502 | 12.6           |
| Neighbor 3 | Bars                     | 20.7                    | 43.2       | 6.6         | 1.4               | 2.9                 | 170         | 0.08589 | 11.6           |
| Neighbor 4 | Bars                     | 22.2                    | 45.8       | 6.7         | 1.5               | 3.4                 | 230         | 0.08589 | 8.2            |
| Neighbor 5 | Bars                     | 20.7                    | 43.6       | 6.6         | 1.4               | 2.9                 | 170         | 0.08989 | 12.4           |
| Neighbor 6 | Bars                     | 23.3                    | 37.7       | 6.0         | 0.8               | 6.5                 | 190         | 0.09505 | 9.9            |
| Neighbor 7 | Bars                     | 14.9                    | 41.1       | 8.5         | 1.1               | 4.3                 | 87          | 0.10798 | 10.0           |
| Neighbor 8 | Bars                     | 22.3                    | 38.9       | 6.6         | 4.7               | 4.6                 | 130         | 0.10828 | 9.3            |

<sup>1</sup>Bars refers to cereal- and nut-based bars  
d is the Manhattan distance between the query product and the given neighbor. It is calculated using  $d(x, y) = \sum_{i=1}^6 |x_i - y_i|$ , where  $x_i$  and  $y_i$  refer to the  $i$ -th normalized nutrient value of the query point and training point respectively

Estimated fiber content for query product =  $\frac{\sum_{j=1}^8 w_j q_j}{\sum_{j=1}^8 w_j}$

$$= \frac{\frac{1}{0.05212} \times 11.5 + \frac{1}{0.08502} \times 12.6 + \frac{1}{0.08589} \times 11.6 + \frac{1}{0.08589} \times 8.2 + \frac{1}{0.08989} \times 12.4 + \frac{1}{0.09505} \times 9.9 + \frac{1}{0.10798} \times 10 + \frac{1}{0.10828} \times 9.3}{\frac{1}{0.05212} + \frac{1}{0.08502} + \frac{1}{0.08589} + \frac{1}{0.08589} + \frac{1}{0.08989} + \frac{1}{0.09505} + \frac{1}{0.10798} + \frac{1}{0.10828}}$$
$$= \frac{1019.9728}{94.3758}$$

= 10.8 g per 100g

## Supplementary Text S2: Predicting fiber content for example product using ingredients-based algorithm

|                         | Nutrients per 100g or 100mL                                                             |             |               |             | Step 2:<br>Predict ingredient proportions (%) | Step 3:<br>Sum the amount of fiber from each ingredient |
|-------------------------|-----------------------------------------------------------------------------------------|-------------|---------------|-------------|-----------------------------------------------|---------------------------------------------------------|
|                         | Carbohydrates (g)                                                                       | Protein (g) | Total fat (g) | Sodium (mg) |                                               |                                                         |
| <b>Product</b>          | 11.0                                                                                    | 2.1         | 5.0           | 4.9         |                                               |                                                         |
| <b>Ingredients</b>      | <b>Step 1:</b> Disaggregate ingredients list and determine ingredient nutrient profiles |             |               |             |                                               | <b>Fiber (g per 100g or 100mL)</b>                      |
| Chia seed gel (40%*)    |                                                                                         |             |               |             |                                               |                                                         |
| Filtered water          | 0.0                                                                                     | 0.0         | 0.0           | 1.0         | 29.0                                          | 0.0                                                     |
| Chia seed               | 7.7                                                                                     | 16.5        | 30.7          | 16.0        | 11.0                                          | 34.4                                                    |
| Apple puree (35%*)      | 12.7                                                                                    | 0.3         | 0.2           | 1.0         | 35.0                                          | 2.3                                                     |
| Coconut milk            | 1.7                                                                                     | 1.3         | 12.8          | 18.0        | 12.0                                          | 0.2                                                     |
| Apple dice (8%*)        | 12.7                                                                                    | 0.3         | 0.2           | 1.0         | 8.0                                           | 2.3                                                     |
| Organic cane sugar      | 100                                                                                     | 0.0         | 0.0           | 0.0         | 4.2                                           | 0.0                                                     |
| Lemon juice concentrate | 39.6                                                                                    | 0.2         | 0.0           | 37.0        | 0.4                                           | 0.0                                                     |
| Cinnamon (0.4%*)        | 25.5                                                                                    | 4.2         | 2.7           | 18.0        | 0.4                                           | 54.2                                                    |
|                         |                                                                                         |             |               |             |                                               | <b>Total fiber content :</b>                            |
|                         |                                                                                         |             |               |             |                                               | 5g per 100g                                             |

\*Declared ingredient proportions in the ingredients statement

### Step 1:

All ingredient lists in the test dataset were disaggregated. This produced a list of 24,346 unique ingredient names and cleaning of this list (e.g. condensing “strawberry” and “strawberries” to “strawberry”) resulted in a list of 744 unique ingredients names in the test dataset. To obtain ingredient-level nutrient profiles, 612 ingredients were mapped to ingredients with nutrient composition data in Food Standard Australia New Zealand’s nutrient composition database [2], 25 ingredients were mapped to ingredients with nutrient composition data in FoodSwitch [3], 32 ingredients were mapped to ingredients with nutrient composition data found through google search, and 75 were not mapped as they were assumed to have a value of zero for each nutrient (e.g. colors).

### Step 2:

A mathematical optimisation program was used to predict the proportion of each ingredient. This program considered ingredient-level nutrient profiles to select ingredient proportions that produced a calculated nutrient profile as close as possible to the reported product nutrient profile. This was achieved by minimizing the level of discrepancy between the reported and calculated nutrient profiles as expressed in the objective function (OF):

$$OF = \sum_{i=1}^4 |r_i - c_i|$$

where  $r_i$  is the reported nutrient value of the  $i$ -th nutrient (where included nutrients are carbohydrates, protein, total fat, and sodium) and  $c_i$  is the value of the  $i$ -th nutrient calculated using ingredient weights. All nutrients were standardized so that each nutrient had similar influence in the algorithm.

All predicted ingredient proportions were subject to constraints:

- Any declared ingredient proportions declared in the ingredients list must be used
- Ingredient proportions must be positive
- Ingredient proportions must sum to 100%
- Ingredient proportions must be in descending order

**Step 3:**

The amount of fiber in each ingredient was summed to determine the overall fiber content in the product

**Supplementary Table S4:** Confusion matrix on true versus predicted fiber density classes

|                 |            | True class |      |        |      | Precision                            |
|-----------------|------------|------------|------|--------|------|--------------------------------------|
|                 |            | Negligible | Low  | Medium | High |                                      |
| Predicted class | Negligible | 90         | 57   | 0      | 0    | 0.61                                 |
|                 | Low        | 62         | 642  | 114    | 19   | 0.77                                 |
|                 | Medium     | 7          | 180  | 452    | 107  | 0.61                                 |
|                 | High       | 3          | 44   | 130    | 548  | 0.76                                 |
|                 | Recall     | 0.56       | 0.70 | 0.65   | 0.81 | Overall classification accuracy: 71% |

Fiber density classes are defined (in g per 100g/mL) as: negligible [0,0.9), low [0.9, 3.7), medium [3.7, 7.3), and high [7.3, 100]. Cells are shaded according to number of products.

Precision measures the proportion of positive classifications that were correct and is calculated using the formula:

Precision = true positives/(true positives + false positives)

Recall measures the proportion of actual positives that were classified correctly and is calculated using the formula:

Recall = true positives/(true positives + false negatives)

**Supplementary Table S5:** Comparison approaches on the test dataset

| Food category                   | <i>n</i>     | Performance of the KNN approach |             |             |             | Performance of Ng <i>et al.</i> 's approach |             |             |             |
|---------------------------------|--------------|---------------------------------|-------------|-------------|-------------|---------------------------------------------|-------------|-------------|-------------|
|                                 |              | <i>R</i> <sup>2</sup>           | MAE         | $\rho$      | CA          | <i>R</i> <sup>2</sup>                       | MAE         | $\rho$      | CA          |
| Biscuits                        | 336          | 0.68                            | 1.57        | 0.76        | 0.67        | 0.30                                        | 1.96        | 0.77        | 0.61        |
| Bread                           | 379          | 0.27                            | 1.34        | 0.62        | 0.66        | -1.69                                       | 2.23        | 0.55        | 0.53        |
| Breakfast cereals               | 236          | 0.59                            | 1.86        | 0.64        | 0.82        | 0.66                                        | 1.62        | 0.66        | 0.77        |
| Cakes, muffins and pastries     | 70           | 0.00                            | 2.82        | 0.28        | 0.56        | -0.26                                       | 2.51        | 0.57        | 0.69        |
| Cereal and nut-based bars       | 167          | 0.32                            | 1.63        | 0.57        | 0.72        | -0.49                                       | 2.72        | 0.22        | 0.48        |
| Crisps and snacks               | 320          | 0.26                            | 1.54        | 0.64        | 0.64        | -0.35                                       | 2.34        | 0.57        | 0.51        |
| Fruit                           | 174          | 0.37                            | 2.07        | 0.69        | 0.68        | 0.18                                        | 2.47        | 0.56        | 0.57        |
| Fruit and vegetable juices      | 164          | 0.04                            | 0.37        | 0.34        | 0.66        | -2.48                                       | 0.71        | 0.29        | 0.57        |
| Nuts and seeds                  | 100          | 0.71                            | 1.77        | 0.62        | 0.78        | 0.83                                        | 1.55        | 0.63        | 0.77        |
| Other cereal and grain products | 105          | 0.95                            | 2.29        | 0.93        | 0.76        | 0.85                                        | 4.36        | 0.87        | 0.70        |
| Pasta                           | 60           | -0.55                           | 1.18        | 0.36        | 0.75        | -0.35                                       | 1.29        | 0.33        | 0.80        |
| Ready meals                     | 93           | 0.23                            | 1.00*       | 0.29        | 0.78*       | 0.53                                        | 1.00*       | 0.44        | 0.78*       |
| Soup                            | 103          | 0.89                            | 1.13        | 0.71        | 0.75        | 0.42                                        | 2.46        | 0.65        | 0.66        |
| Vegetables                      | 148          | 0.38                            | 1.23        | 0.68        | 0.80        | 0.29                                        | 1.54        | 0.63        | 0.68        |
| <b>All</b>                      | <b>2,455</b> | <b>0.84</b>                     | <b>1.52</b> | <b>0.84</b> | <b>0.71</b> | <b>0.68</b>                                 | <b>2.07</b> | <b>0.77</b> | <b>0.62</b> |

The superior score for each performance metric is highlighted for each food category

\*Wherever KNN and Ng *et al.*'s approach produced the same score for a performance metric, both scores were highlighted

*R*<sup>2</sup> is the coefficient of determination. It represents the proportion of variance in fiber content explained by the features in the model, where 1 indicates a perfect fit.

MAE is mean absolute error. It is the average of all absolute errors.

$\rho$  is the Spearman rank correlation. It represents how well the model ranks products from highest to lowest in fiber content, where 1 indicates perfect ranking.

CA is classification accuracy. It measures the proportion of correctly predicted fiber classes. Classes are defined (in g per 100g or 100mL) as: negligible density [0,0.9), low density [0.9, 3.7), medium density [3.7, 7.3), and high density [7.3, 100].

## References

1. *Australian Bureau of Statistics Australian Health Survey: Nutrition First Results - Foods and Nutrients*. 2011-12.
2. *Food Standard Australia New Zealand. Food Nutrient Database*. 2013; Available from: <https://www.foodstandards.gov.au/science/monitoringnutrients/ausnut/foodnutrient/Pages/default.aspx>.
3. Dunford, E., et al., *FoodSwitch: A Mobile Phone App to Enable Consumers to Make Healthier Food Choices and Crowdsourcing of National Food Composition Data*. JMIR Mhealth Uhealth, 2014. 2(3): p. e37.
